# Supplementary material for: Bordetella pertussis, the Causative Agent of Whooping Cough, Evolved from a Distinct, Human-Associated Lineage of B. bronchiseptica
Source: PubMed Central journal article supplement (PMC1323478; doi:10.1371/journal.ppat.0010045), 2005-12-30
Supplement: ppat.0010045.st001.pdf [file ppat.0010045.st001.pdf]

|       |        |     |   |   |   |    |   |   |   |    |    |   |   |   |        |             |         |           |                      |
|-------|--------|-----|---|---|---|----|---|---|---|----|----|---|---|---|--------|-------------|---------|-----------|----------------------|
| B1981 | BP     | II  | 1 | 1 | 1 | 3  | 1 | 1 | 1 | 2  | +  | - | + | + | human  | unknown     | unknown | GMT1      | [4]                  |
| B0024 | BPP-HU | III | 2 | 2 | 2 | 2  | 2 | 2 | 5 | 19 | -  | + | + | - | human  | Netherlands | 1985    | 1206      | [1]                  |
| B0266 | BPP-HU | III | 2 | 2 | 2 | 2  | 2 | 2 | 5 | 19 | -  | + | + | - | human  | Finland     | 1982    | FL2       | [1, 5]               |
| B0267 | BPP-HU | III | 2 | 2 | 2 | 2  | 2 | 2 | 5 | 19 | -  | + | + | - | human  | Finland     | 1982    | FL3       | [5]                  |
| B0273 | BPP-HU | III | 2 | 2 | 2 | 2  | 2 | 2 | 5 | 19 | -  | + | + | - | human  | USA         | unknown | 531       | [1]                  |
| B0285 | BPP-HU | III | 2 | 2 | 2 | 2  | 2 | 2 | 5 | 19 | -  | + | + | - | human  | Japan       | 1985    | 167       | [7]                  |
| B0291 | BPP-HU | III | 2 | 2 | 2 | 2  | 2 | 2 | 5 | 19 | -  | + | + | - | human  | Japan       | 1985    | 166       | [7]                  |
| B0319 | BPP-HU | III | 2 | 2 | 2 | 2  | 2 | 2 | 5 | 19 | -  | + | + | - | human  | USA         | 1981    | 81A-3084  | This study           |
| B1318 | BPP-HU | III | 1 | 2 | 2 | 2  | 2 | 2 | 5 | 30 | -  | + | + | - | human  | Netherlands | 1985    | K65/K75   | This study           |
| B2002 | BPP-HU | III | 2 | 2 | 2 | 2  | 2 | 2 | 5 | 19 | -  | + | + | - | human  | Germany     | unknown | 12822     | [3] Genome sequenced |
| B0232 | BB     | IV  | * | 3 | 2 | 6  | 2 | 4 | 6 | 4  | 18 | - | - | - | human  | Germany     | unknown | 397       | W. Gaastra           |
| B0243 | BB     | IV  | * | 4 | 2 | 1  | 2 | 2 | 8 | 7  | 28 | - | - | - | pig    | Ukraine     | unknown | 654       | [1]                  |
| B0259 | BB     | IV  | * | 4 | 2 | 6  | 4 | 1 | 8 | 8  | 29 | - | - | - | turkey | USA         | unknown | 707       | [1]                  |
| B1968 | BB     | IV  | * | 3 | 5 | 6  | 2 | 1 | 6 | 6  | 22 | - | - | - | dog    | unknown     | unknown | 591       | [1]                  |
| B1969 | BB     | IV  | * | 3 | 2 | 6  | 2 | 4 | 6 | 4  | 18 | - | - | - | human  | unknown     | unknown | 675       | [1]                  |
| B2114 | BB     | IV  | * | 3 | 2 | 1  | 2 | 4 | 6 | 6  | 25 | - | - | - | human  | Netherlands | 1999    | 99-003    | This study           |
| B2490 | BB     | IV  | * | 3 | 5 | 1  | 5 | 7 | 8 | 6  | 9  | - | - | - | human  | USA         | unknown | SBL-F6116 | G. Sanden            |
| B2491 | BB     | IV  | * | 3 | 2 | 8  | 2 | 4 | 8 | 9  | 8  | - | - | - | human  | USA         | unknown | SBL-F6368 | G. Sanden            |
| B2492 | BB     | IV  | * | 6 | 2 | 9  | 4 | 1 | 9 | 7  | 21 | - | - | - | human  | USA         | 1996    | GA96-01   | G. Sanden            |
| B2494 | BB     | IV  | * | 4 | 2 | 1  | 2 | 8 | 8 | 6  | 15 | - | - | - | human  | USA         | unknown | MO149     | G. Sanden            |
| B2495 | BB     | IV  | * | 4 | 5 | 1  | 2 | 4 | 8 | 6  | 17 | - | - | - | human  | USA         | unknown | MO211     | G. Sanden            |
| B2496 | BB     | IV  | * | 3 | 2 | 1  | 2 | 4 | 6 | 7  | 3  | - | - | - | human  | USA         | unknown | MO275     | G. Sanden            |
| B2506 | BB     | IV  | * | 3 | 5 | 1  | 5 | 7 | 6 | 6  | 34 | - | - | - | human  | USA         | 2000    | 00-P-2730 | G. Sanden            |
| B2586 | BB     | IV  | * | 3 | 2 | 1  | 2 | 4 | 6 | 7  | 3  | - | - | - | human  | Argentina   | >1998   | 203       | D. Hozbor            |
| B2588 | BB     | IV  | * | 3 | 5 | 10 | 2 | 4 | 8 | 6  | 35 | - | - | - | human  | Argentina   | >1998   | 5256      | D. Hozbor            |

<sup>1</sup> Strains used in the comparative genomic comparison

<sup>2</sup> Abbreviations: BB=*B. bronchiseptica*; BPP-OV= *B. parapertussis*-ovine; BPP-HU= *B. parapertussis*-human; BP= *B. pertussis*

<sup>3</sup> Numbers between brackets indicate references:

- [1] van der Zee A, Mooi F, van Embden J, Musser J (1997) Molecular evolution and host adaptation of *Bordetella* spp.: phylogenetic analysis using multilocus enzyme electrophoresis and typing with three insertion sequences. *J Bacteriol* 179: 6609-6617.
- [2] Cotter PA, Miller JF (1994) BvgAS-mediated signal transduction: analysis of phase-locked regulatory mutants of *Bordetella bronchiseptica* in a rabbit model. *Infect Immun* 62: 3381-3390.
- [3] Parkhill J, Sebahia M, Preston A, Murphy LD, Thomson N, Harris DE, Holden MT, Churcher CM, Bentley SD, Mungall KL, Cerdeno-Tarraga AM, Temple L, James K, Harris B, Quail MA, Achtman M, Atkin R, Baker S, Basham D, Bason N, Cherevach I, Chillingworth T, Collins M, Cronin A, Davis P, Doggett J, Feltwell T, Goble A, Hamlin N, Hauser H, Holroyd S, Jagels K, Leather S, Moule S, Norberczak H, O'Neil S, Ormond D, Price C, Rabinowitch E, Rutter S, Sanders M, Saunders D, Seeger K, Sharp S, Simmonds M, Skelton J, Squares R, Squares S, Stevens K, Urwin L, Whitehead S, Barrell BG, Maskell DJ (2003) Comparative analysis of the genome sequences of *Bordetella pertussis*, *Bordetella parapertussis* and *Bordetella bronchiseptica*. *Nat Genet*
- [4] Martinez dT, Miller JF, Cotter PA (1996) Comparative analysis of the virulence control systems of *Bordetella pertussis* and *Bordetella bronchiseptica*. *Mol Microbiol* 22: 895-908.
- [5] Mertsola J (1985) Mixed outbreak of *Bordetella pertussis* and *Bordetella parapertussis* infection in Finland. *Eur J Clin Microbiol* 4: 123-128.
- [6] Sato Y, Arai H (1972) Leucocytosis-promoting factor of *Bordetella pertussis*. I. Purification and characterization. *Infect Immun* 6: 899-904.
- [7] Iwata S, Aoyama T, Goto A, Iwai H, Sato Y, Akita H, Murase Y, Okawa T, Iwata T, Kusano S, (1991) Mixed outbreak of *Bordetella pertussis* and *Bordetella parapertussis* in an apartment house. *Dev Biol Stand* 73: 333-341.
- [8] Cherry JD, Mortimer EA, Hackell JG, Scott JV (1991) Clinical trials in the United States and Japan with the Lederle-Takeda and Takeda acellular pertussis-diphtheria-tetanus (APDT) vaccines. The Multicenter APDT Vaccine Study Groups. *Dev Biol Stand* 73: 51-58.
