# Supplementary material for: Bordetella pertussis, the Causative Agent of Whooping Cough, Evolved from a Distinct, Human-Associated Lineage of B. bronchiseptica
Source: PubMed Central journal article supplement (PMC1323478; doi:10.1371/journal.ppat.0010045), 2005-12-30
Supplement: ppat.0010045.st002.pdf [file ppat.0010045.st002.pdf]

<sup>a</sup> Selected functional annotations

<sup>b</sup> ORF numbers between brackets indicate intergenic regions

Contiguous colors indicate that the probes are clustered on the genome.
