# Supplementary material for: Bordetella pertussis, the Causative Agent of Whooping Cough, Evolved from a Distinct, Human-Associated Lineage of B. bronchiseptica
Source: PubMed Central journal article supplement (PMC1323478; doi:10.1371/journal.ppat.0010045), 2005-12-30
Supplement: ppat.0010045.st003.pdf [file ppat.0010045.st003.pdf]

Table S3. Primer characteristics for the genes used in multilocus sequence typing, pertactin sequencing and in the detection of the insertion sequence elements

| Gene name and product <sup>a</sup>                 | BB ORF <sup>b</sup> | BPP ORF <sup>b</sup> | BP ORF <sup>b</sup> | Primer Name                                                                                     | Sequence (5'→3')                                                                                                                                                                                                    | Product length (bp)                                            | Purpose                                           | T <sub>ANN</sub> (°C) |
|----------------------------------------------------|---------------------|----------------------|---------------------|-------------------------------------------------------------------------------------------------|---------------------------------------------------------------------------------------------------------------------------------------------------------------------------------------------------------------------|----------------------------------------------------------------|---------------------------------------------------|-----------------------|
| <i>adk</i> ; adenylate kinase                      | BB2005              | BPP2560              | BP2769              | Adk-F<br>Adk-R                                                                                  | AGCCGCCTTTCTCACCCAACACT<br>TGGGCCAGGACGAGTAGT                                                                                                                                                                       | 513                                                            | A,S <sup>d</sup><br>A,S                           | 54                    |
| <i>fumC</i> ; fumarate hydratase class II          | BB4054              | BPP3619              | BP0248              | FumC-F<br>FumC-R                                                                                | CGTGAACCGGGGCCAGTCGTC<br>GGCCAGCCAGCGCACATCGTT                                                                                                                                                                      | 499                                                            | A,S<br>A,S                                        | 54                    |
| <i>icd</i> ; isocitrate dehydrogenase              | BB3924              | BPP3475              | BP2488              | Icd-F<br>Icd-R                                                                                  | CTGGTCCACAAGGGCAACAT<br>ACACCTGGGTGGCGCCTTC                                                                                                                                                                         | 531                                                            | A,S<br>A,S                                        | 54                    |
| <i>glyA</i> ; serine hydroxymethyltransferase      | BB4348              | BPP3875              | BP2952              | GlyA-F<br>GlyA-R                                                                                | CAACCAGGGCGTGTACATGGC<br>CGCGATGACGTGCATCAG                                                                                                                                                                         | 500                                                            | A,S<br>A,S                                        | 54                    |
| <i>tyrB</i> ; aromatic amino-acid aminotransferase | BB2272              | BPP2024              | BP1795              | TyrB-F<br>TyrB-R                                                                                | CGAGACCTACGCTTATTACGAT<br>TGCCGGCCAGTTTCATTTT                                                                                                                                                                       | 509                                                            | A,S<br>A,S                                        | 54                    |
| <i>pepA</i> ; cytosol aminopeptidase               | BB3736              | BPP3285              | BP2421              | PepA-F<br>PepA-R                                                                                | CGCCCAGGTTGAAGAAAATCGTC<br>ATCAGGCCACCACATCCAG                                                                                                                                                                      | 509                                                            | A,S<br>A,S                                        | 54                    |
| <i>pgm</i> ; phosphoglucomutase                    | BB0885              | BPP0800              | BP3141              | Pgm-F<br>Pgm-R                                                                                  | CGCCCATGTCACCAGCACCGA<br>CGCCGTCTATCGTAACCAG                                                                                                                                                                        | 545                                                            | A,S<br>A,S                                        | 54                    |
| IS481; transposase                                 | -                   | -                    | multiple            | IS481-F<br>IS481-R                                                                              | GGGGTCACCGCGCGACTGT<br>GGGCCTGATGCTCGTAGCGC                                                                                                                                                                         | 289                                                            | A<br>A                                            | 60                    |
| IS1001; transposase                                | -                   | multiple             | -                   | IS1001-F<br>IS1001-R                                                                            | CGCCGCTTGATGACCTTGATA<br>CACCGCTACGAGTTGGAGAT                                                                                                                                                                       | 498                                                            | A<br>A                                            | 60                    |
| IS1002; transposase                                | -                   | multiple             | multiple            | IS1002-F<br>IS1002-R                                                                            | TCCCAGCTCCACGCACACCG<br>AACAACCATAAGCATGCGCG                                                                                                                                                                        | 705                                                            | A<br>A                                            | 54                    |
| IS1663; transposase                                | -                   | -                    | multiple            | IS1663-F<br>IS1663-R                                                                            | GGGTCTGTATCACGAGCAAGCGG<br>CTTTGCGATTGAGCTCACGCAAC                                                                                                                                                                  | 265                                                            | A<br>A                                            | 60                    |
| <i>prn</i> ; pertactin                             | BB1366              | BPP1150              | BP1054              | Pm-SPF1<br>Pm-SPR3<br>Pm-SPF2<br>Pm-SPR1<br>Pm-SPF3<br>Pm-SPF4<br>Pm-SPR2<br>Pm-SPR4<br>Pm-SPR5 | TCCCTGTTCCATCGCGGTG<br>GTTGGCGGCCAATCGATAGC<br>ATCGCGCTCTATGTGGCCG<br>CCTGAGCCTGGAGACTGGCAC<br>CACCGCACGGCAATGTCATC<br>GGCGACCTTTACCCTTGCCAA<br>CAGCGTCGCGTCCAGGTAGA<br>GCAAGGTGATCGACAGGGGC<br>TGGACCGTGACATTGGCGC | 1729, 1720, 1732 <sup>c</sup><br>2399, 2426, 2389 <sup>c</sup> | A,S<br>A,S<br>A,S<br>A,S<br>S<br>S<br>S<br>S<br>S | 60<br>60              |

<sup>a</sup> Gene name and product as annotated by the Sanger Centre sequencing team

<sup>b</sup> ORF numbers as annotated by the Sanger Centre sequencing team

<sup>c</sup> PCR fragment sizes in *B. bronchiseptica*, *B. parapertussis*, *B. pertussis*, respectively

<sup>d</sup> Abbreviations: A=amplification; S=sequencing
